# Supplementary material for: Topological analysis and control of post-synthetic metalation sites in Zr-based metal–organic frameworks
Source: Royal Society of Chemistry journal article supplement (doi:10.1039/d3tc03606e), 2023-12-22
Supplement: d3tc03606e1.pdf [file d3tc03606e1.pdf]

Electronic Supplementary Information for

## Topological analysis and control of post-synthetic metalation sites in Zr-based Metal-organic Frameworks

Pol Gimeno-Fonquernie,<sup>a</sup> Jorge Albalad,<sup>a</sup> Jason R. Price,<sup>b</sup> Witold M. Bloch,<sup>c</sup> Jack Evans,<sup>a\*</sup> Christian J. Doonan<sup>a\*</sup> and Christopher J. Sumby<sup>a\*</sup>

<sup>a</sup> Centre for Advanced Nanomaterials and Department of Chemistry, School of Physics, Chemistry and Earth Sciences, The University of Adelaide, Adelaide, SA 5000, Australia.

Email: [j.evans@adelaide.edu.au](mailto:j.evans@adelaide.edu.au); [christian.doonan@adelaide.edu.au](mailto:christian.doonan@adelaide.edu.au); [christopher.sumby@adelaide.edu.au](mailto:christopher.sumby@adelaide.edu.au)

<sup>b</sup> ANSTO Melbourne, The Australian Synchrotron, 800 Blackburn Rd, Clayton, Vic 3168, Australia.

<sup>c</sup> College of Science & Engineering, Flinders University, Sturt Road, Bedford Park, SA 5042, Australia.

## Table of Contents

|     |                                                                                 |    |
|-----|---------------------------------------------------------------------------------|----|
| S1. | Main text supporting data.....                                                  | 3  |
| S2. | Fourier Transform Infrared Spectroscopy (FTIR) spectra.....                     | 18 |
| S3. | Adsorption experiments .....                                                    | 19 |
| S4. | Single crystal X-ray crystallography .....                                      | 22 |
|     | S4.1. Specific Data and Refinement Details                                      | 22 |
|     | S4.2. Thermal ellipsoid plots for all structures at the 50% probability level   | 22 |
|     | S4.3. Tables of X-ray crystallography data collection and refinement parameters | 25 |
| S5. | Le Bail Refinements of the PXRD Data .....                                      | 26 |

## S1. Main text supporting data

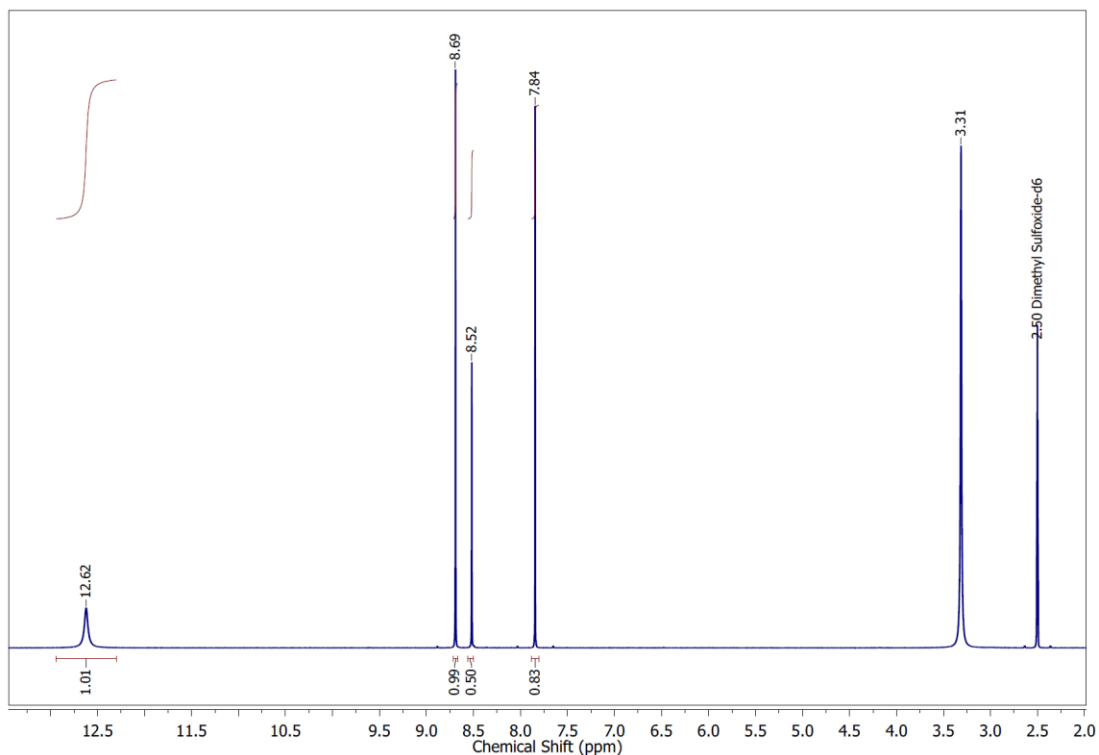

**Figure S1.**  $^1\text{H}$  NMR spectrum of  $\text{L1H}_4$  (500 MHz,  $\text{DMSO-d}_6$ ): 12.62 (s, 4H, COOH), 8.69 (s, 4H,  $\text{CH}_2$  pyrazole), 8.52 (s, 2H, N-CH-N), 7.84 (s, 4H,  $\text{CH}_2$  pyrazole).

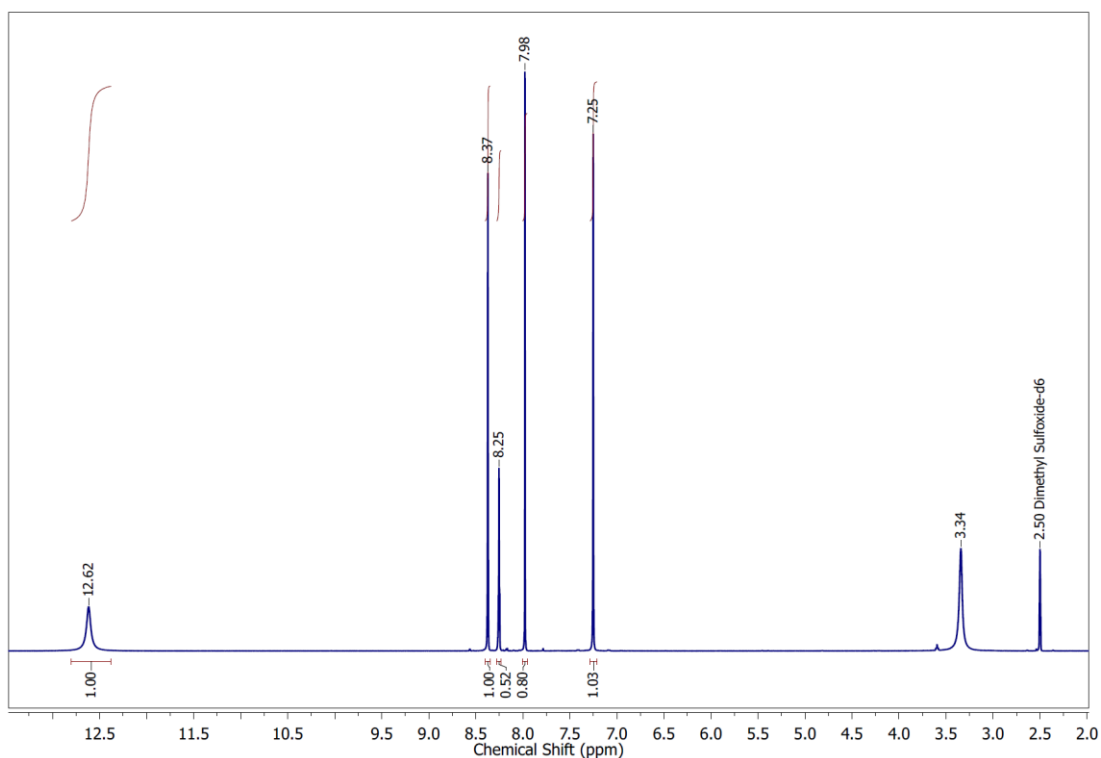

**Figure S2.**  $^1\text{H}$  NMR spectrum of  $\text{L2H}_4$  (500 MHz,  $\text{DMSO-d}_6$ ): 12.62 (s, 4H, COOH), 8.37 (s, 4H,  $\text{CH}_2$  pyrazole), 8.25 (s, 2H, N-CH-N), 7.98 (s, 4H,  $\text{CH}_2$  pyrazole), 7.25 (s, 4H, CH phenyl).

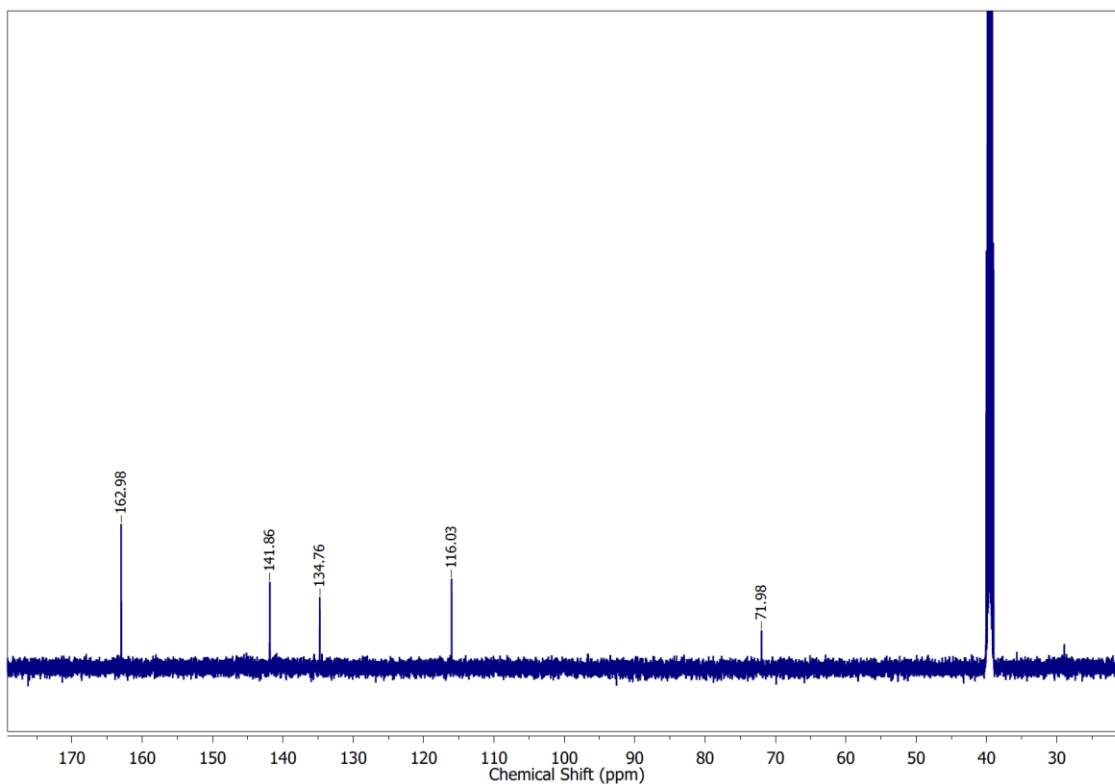

**Figure S3.**  $^{13}\text{C}$  NMR spectrum of  $\text{L1H}_4$  (500 MHz,  $\text{DMSO-d}_6$ ): 162.98 (COOH), 141.86 (C pyr), 134.76 (C pyr), 116.03 (C pyr), 71.98 (C- $\text{sp}^3$ ).

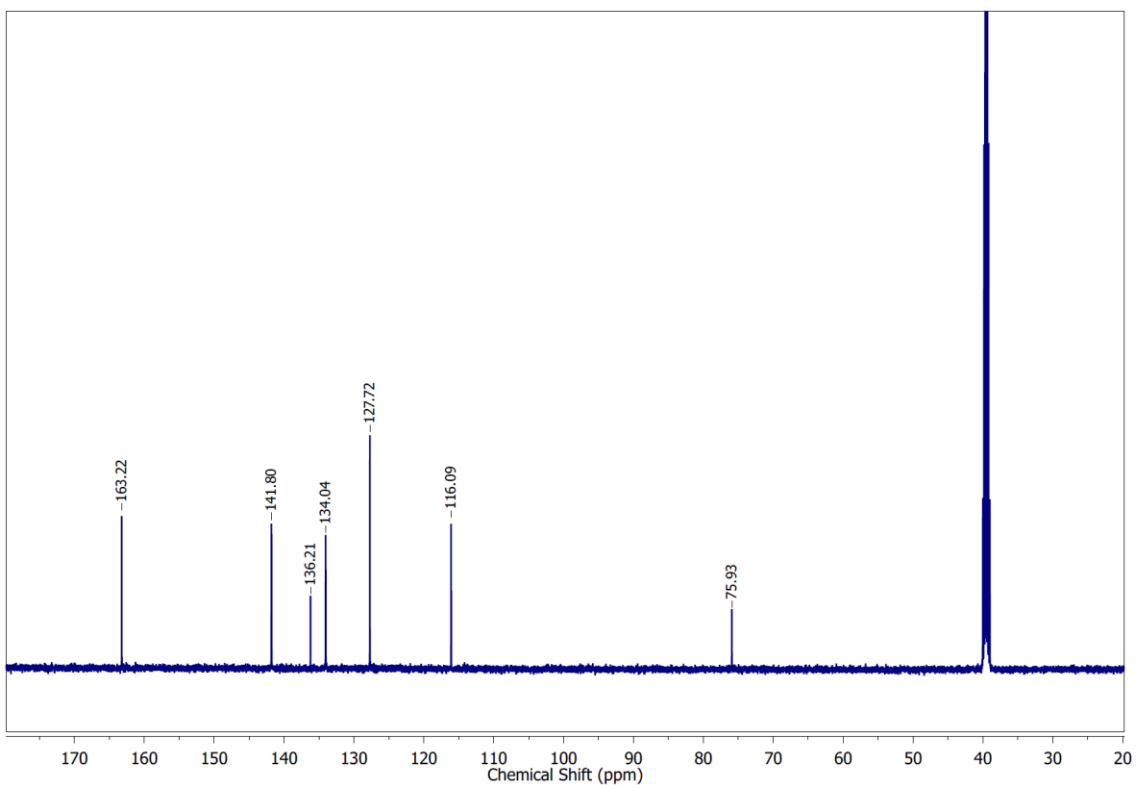

**Figure S4.**  $^{13}\text{C}$  NMR spectrum of  $\text{L2H}_4$  (500 MHz,  $\text{DMSO-d}_6$ ): 163.22 (COOH), 141.80 (COOH), 136.21 (C pyr), 134.04 (C pyr), 127.72 (C phenyl), 116.09 (s, 4H, C pyr), 75.93 (C- $\text{sp}^3$ ).

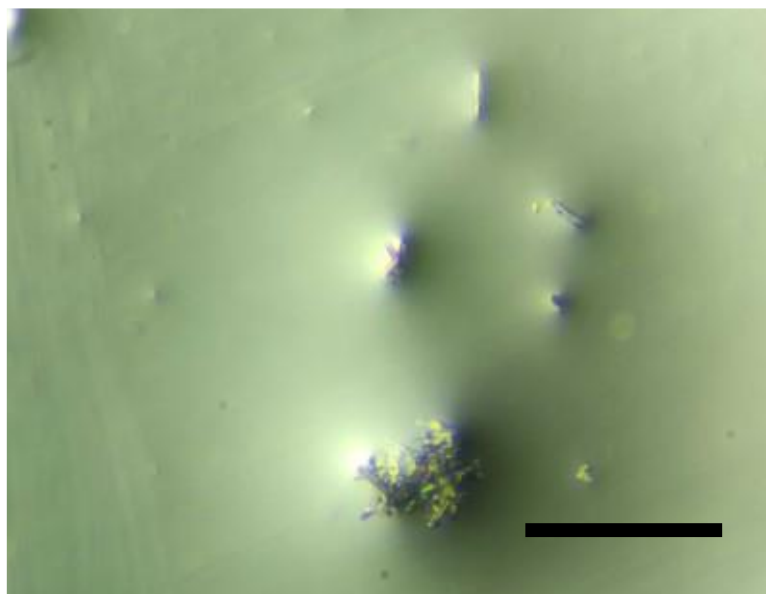

**Figure S5.** Photograph down the optical microscope of the UAM-10 crystals. Scale bar = 500  $\mu\text{m}$ .

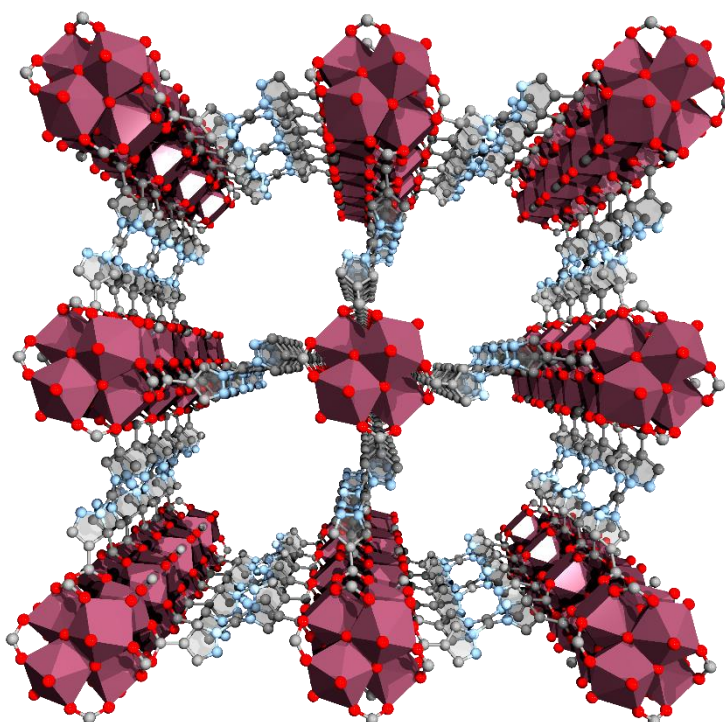

**Figure S6.** Representation of the structure of UAM-10 along the  $c$  axis (C, grey; N, light blue; O, red; Zr, dark red). Hydrogens have been omitted for clarity.

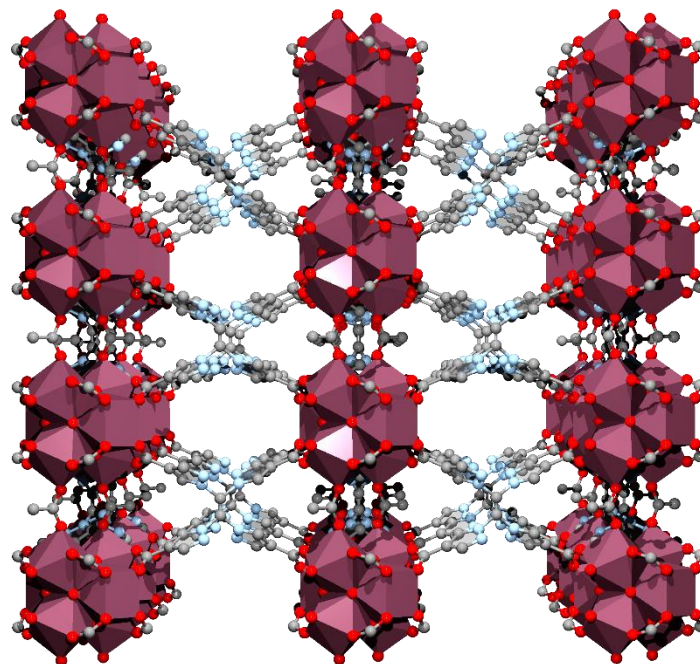

**Figure S7.** Representation of the structure of UAM-10 along the *a* axis (C, grey; N, light blue; O, red; Zr, dark red). Hydrogens have been omitted for clarity.

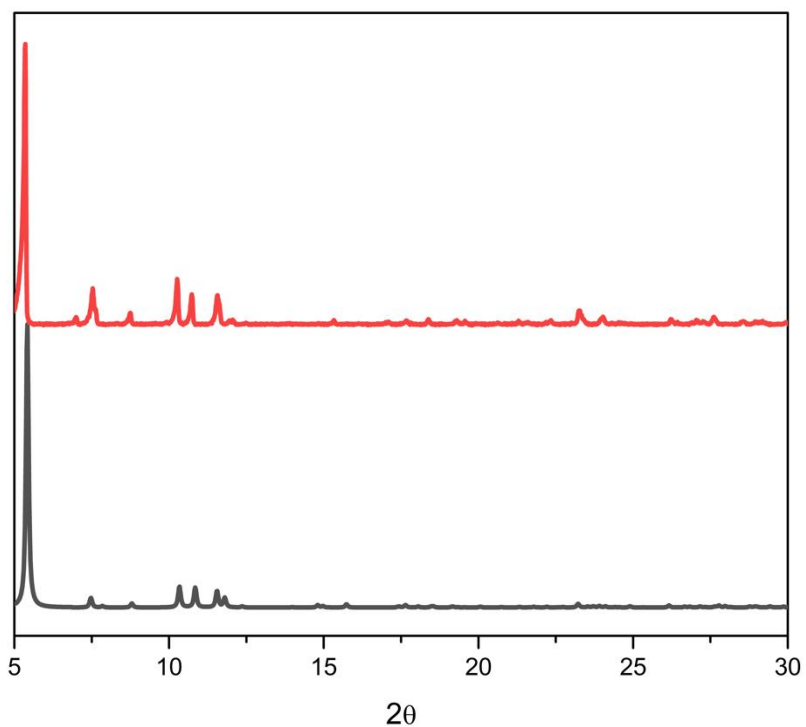

**Figure S8.** PXRD plots for **UAM-10 as made** (red) versus simulated **UAM-10** (black).

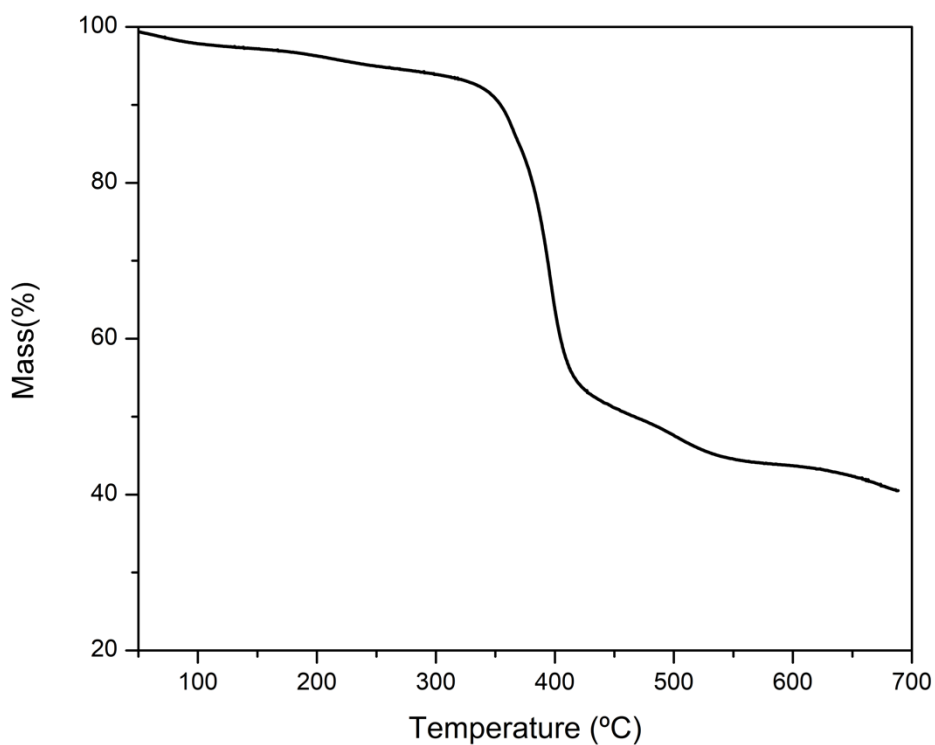

**Figure S9.** Thermogravimetric analysis plot for **UAM-10**. Analysis conditions: 50 °C – 700 °C at 5 °C/min, under an oxidising (air) atmosphere.

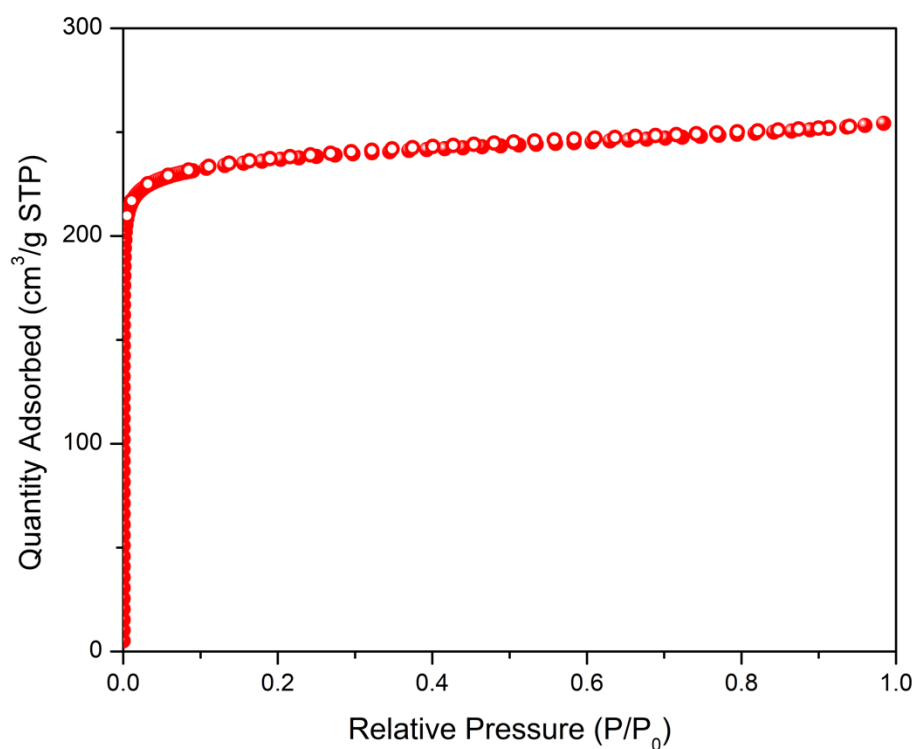

**Figure S10.** 77 K  $N_2$  isotherm data of **UAM-10** after activation from acetone at 120 °C for 3 h. Filled circles represent adsorption; open circles represent desorption.

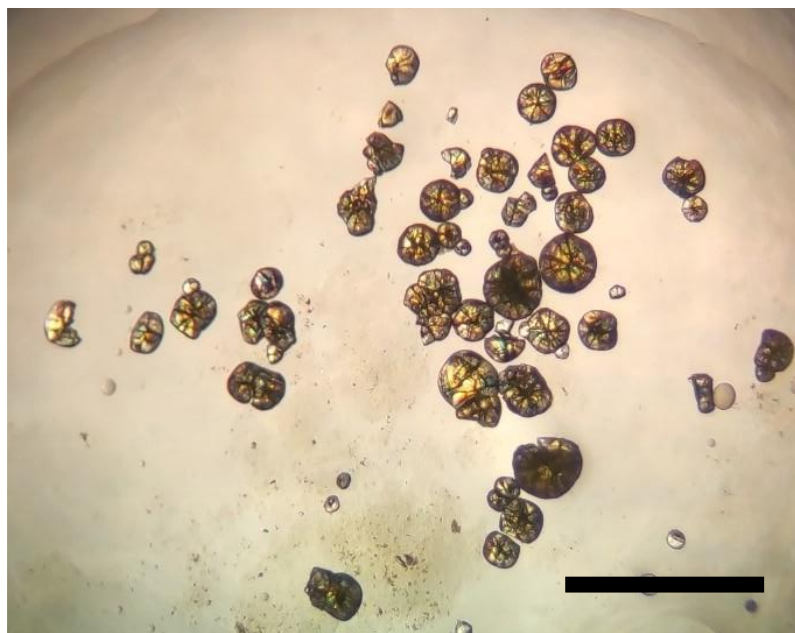

**Figure S11.** Optical image of UAM-11 crystals. Structure determination was conducted on crystals excised from the clumps. Scale bar = 500  $\mu\text{m}$ .

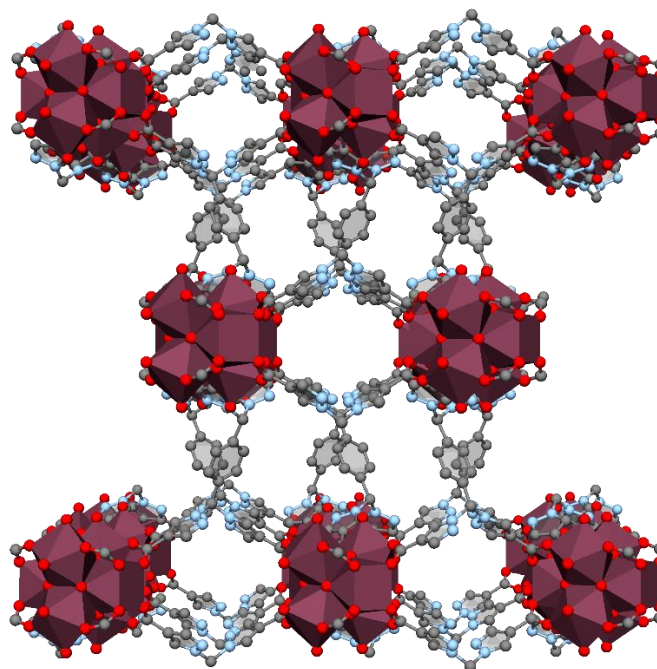

**Figure S12.** Representation of the structure of UAM-11 along the  $(0,1,1)$  axis (C, grey; N, light blue; O, red; Cu, green; Zr, dark red; I, pink). Hydrogens have been omitted for clarity.



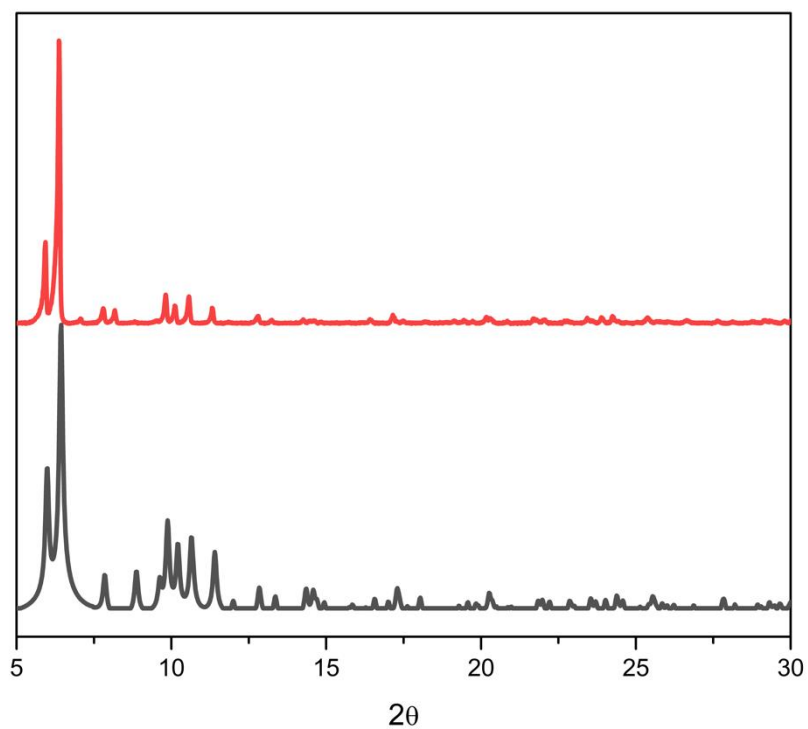

**Figure S13.** PXRD plots for **UAM-11 as made** (red) versus simulated **UAM-11** (black).

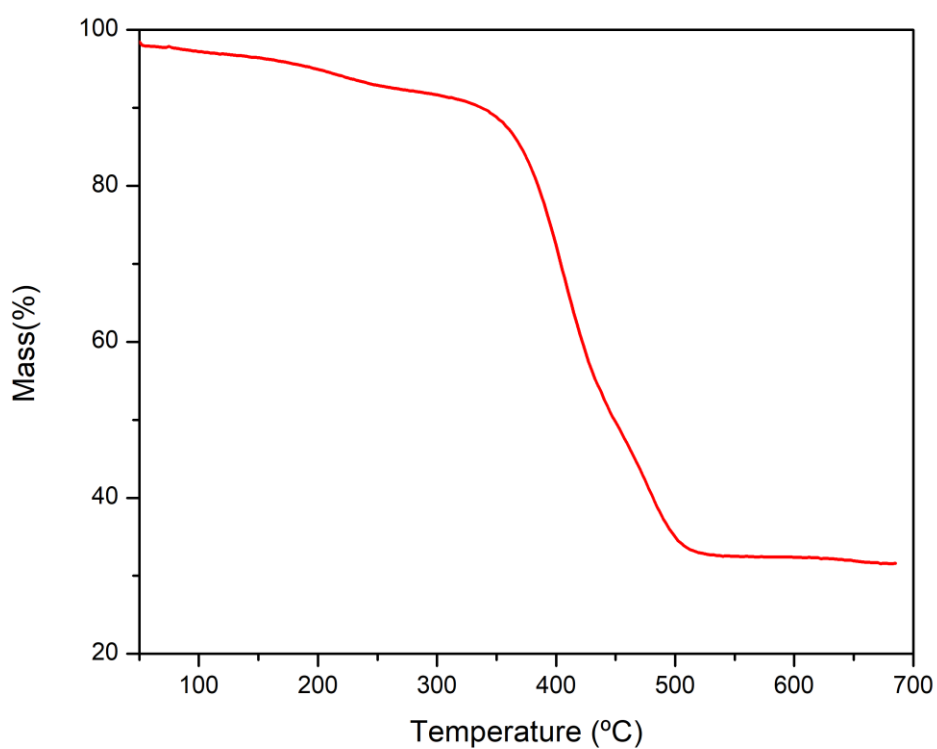

**Figure S14.** Thermogravimetric analysis plot of **UAM-11**. Analysis conditions: 50 °C – 700 °C at 5 °C/min, under an oxidising (air) atmosphere.

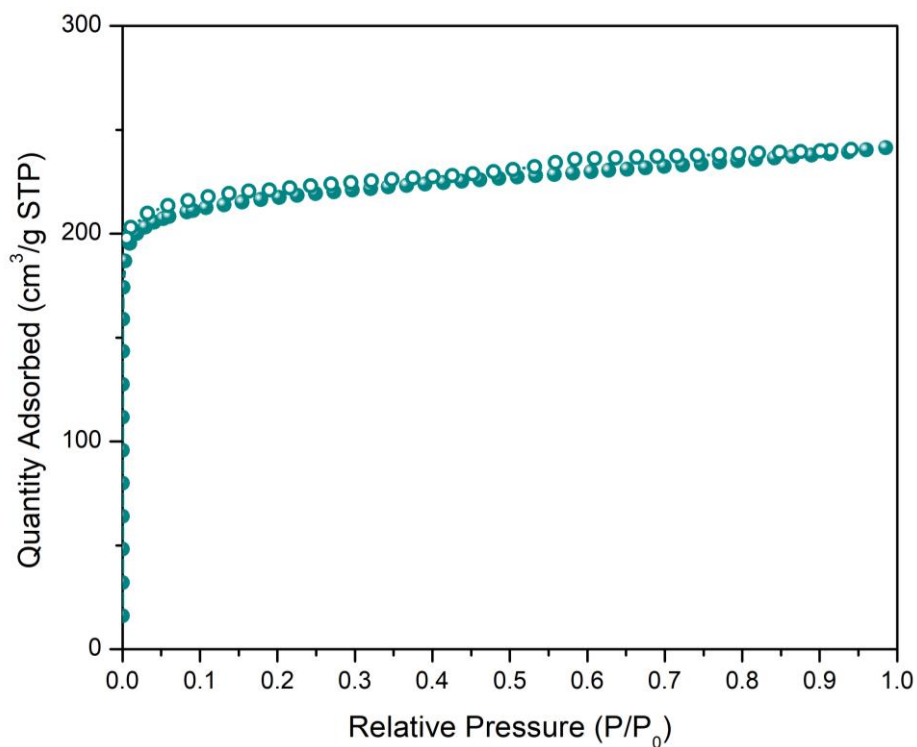

**Figure S15.** 77 K  $N_2$  isotherm data of **UAM-11** after activation from acetone at 120 °C for 3 h. Filled circles represent adsorption; open circles represent desorption.

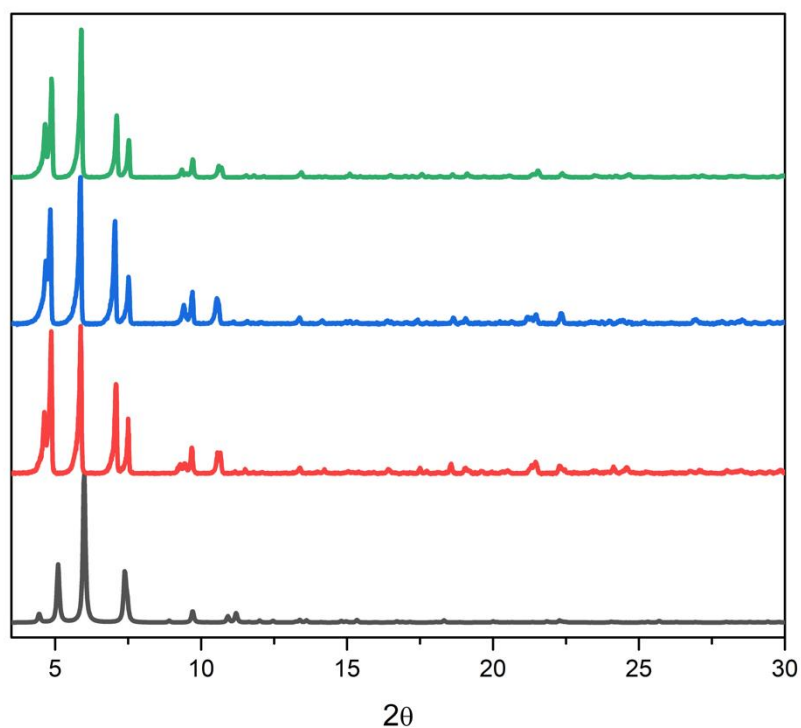

**Figure S16.** PXRD plots for **UAM-1000-BA as made** (red), **UAM-1000-AA as made** (blue) and **UAM-1000-TFA as made** (green) versus simulated **UAM-1000** (black). BA = benzoic acid, AA = acetic acid and TFA = trifluoroacetic acid.

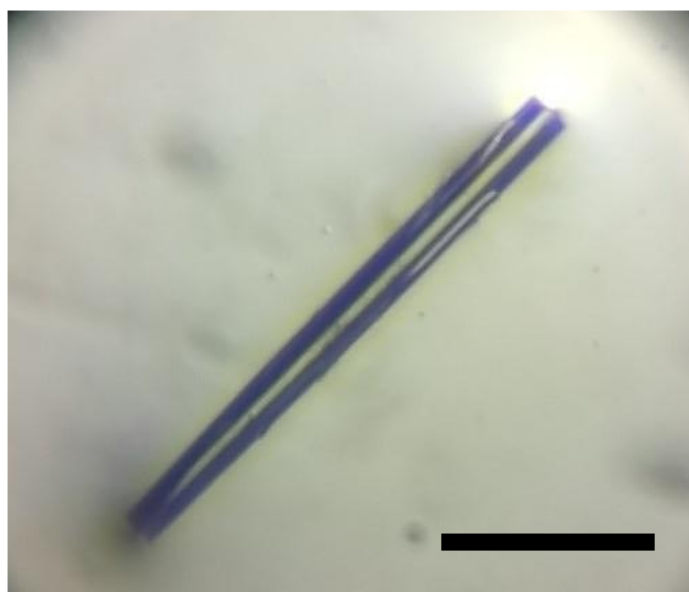

**Figure S17.** An image of a UAM-1002 crystal. Scale bar = 1 mm.

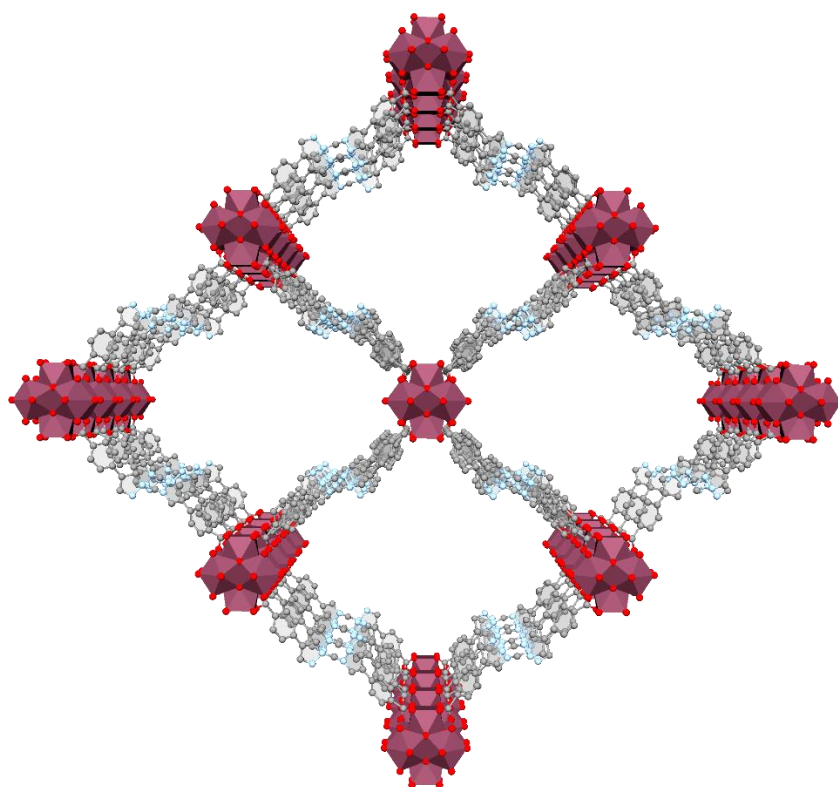

**Figure S18.** Representation of the structure of **UAM-1002** in the *ac* plane (C, grey; N, light blue; O, red; Cu, green; Zr, dark red; I, pink). Hydrogens have been omitted for clarity.

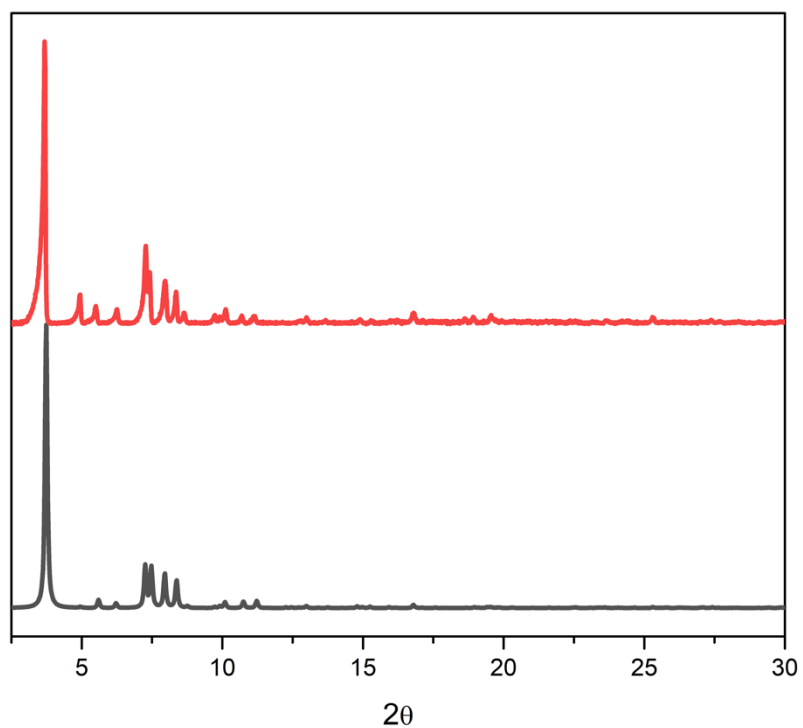

**Figure S19.** PXRD plots for **UAM-1002 as made** (red) versus simulated **UAM-1002** (black).

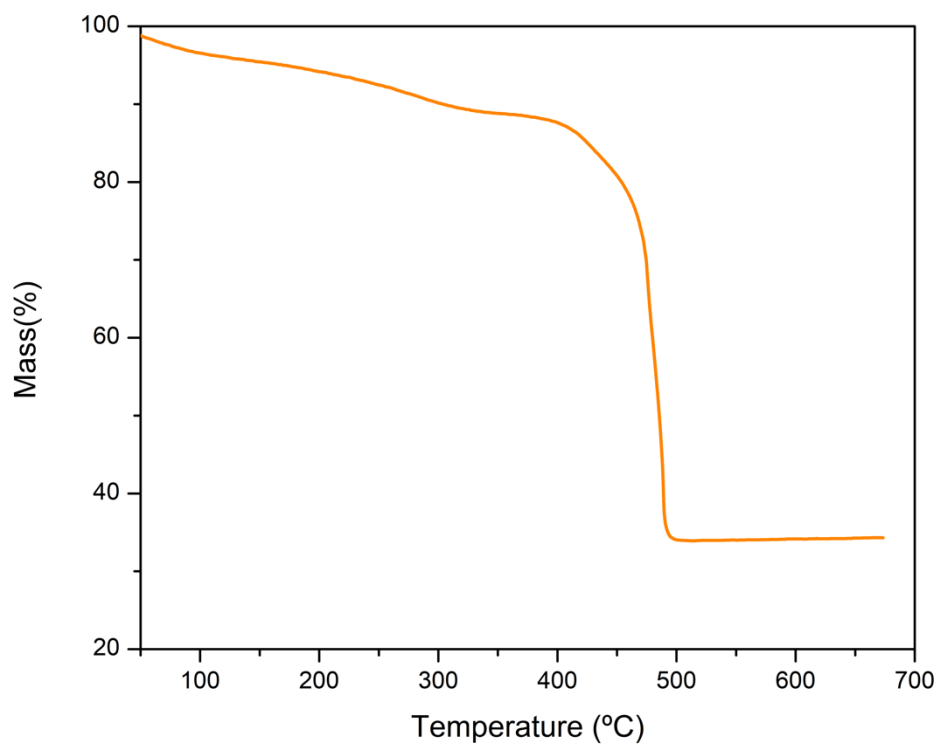

**Figure S20.** Thermogravimetric analysis spectrum of **UAM-1002** (black). Analysis conditions: 50 °C – 700 °C at 5 °C/min, under an oxidising (air) atmosphere.

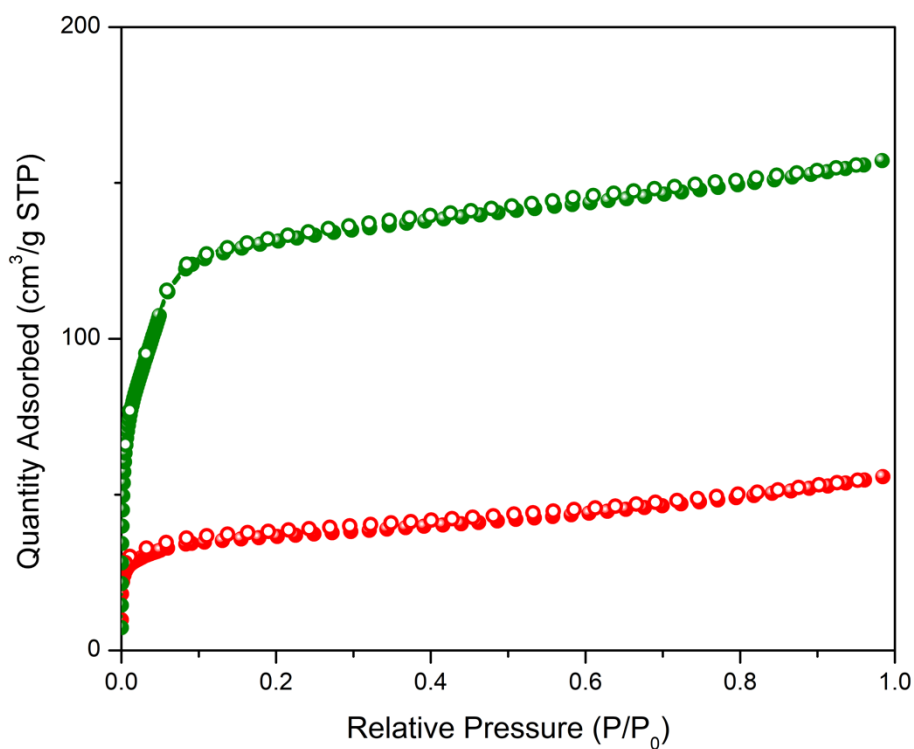

**Figure S21.** 77 K  $N_2$  isotherm data of **UAM-1002** after activation from acetone at 120 °C for 3 h (red) and after activation with supercritical  $CO_2$  (green). Filled circles represent adsorption, open circles represent desorption.

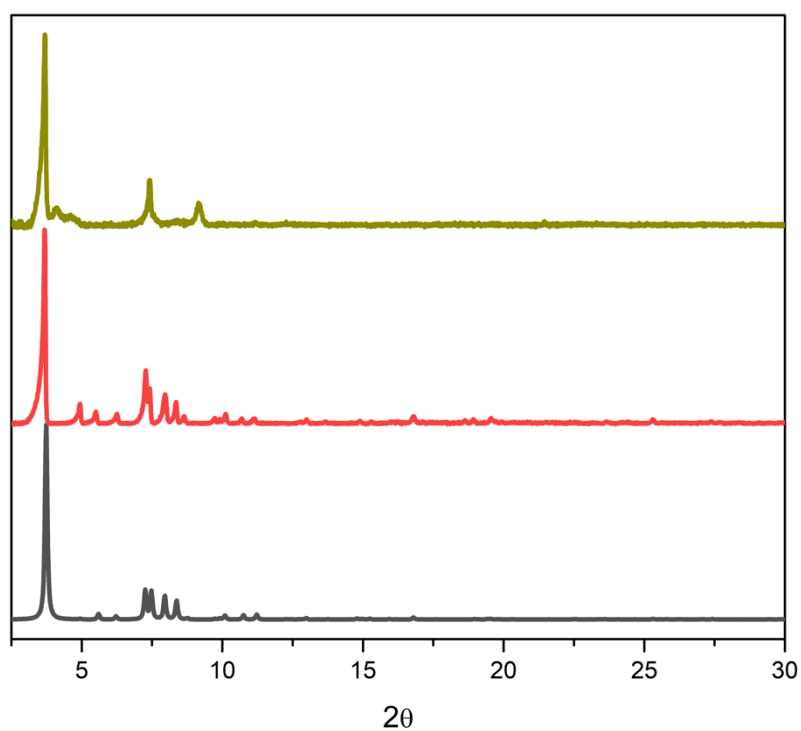

**Figure S22.** PXRD plots for **UAM-1002 as made** (red) and **UAM-1002-activated** (green) versus simulated **UAM-1002** (black). **UAM-1002** was activated using supercritical  $CO_2$ .

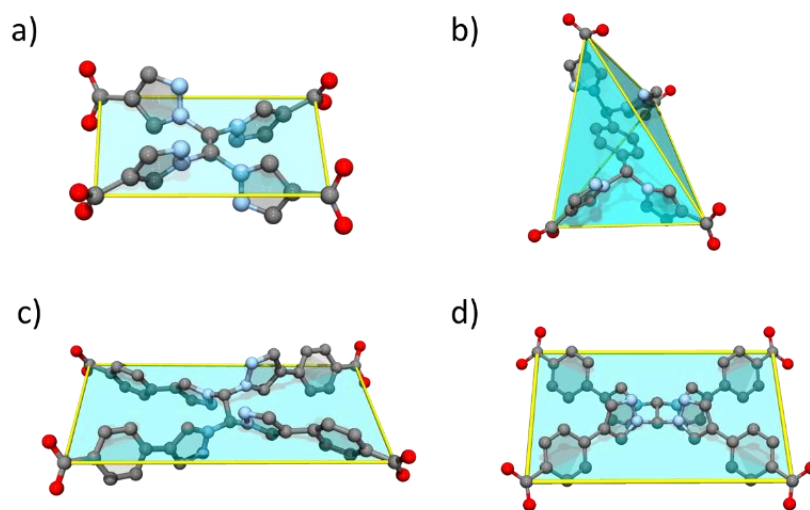

**Figure S23.** Representations of the organic linkers in their respective MOF structures. a) L1 in UAM-10, b) L2 in UAM-11, c) L3 in UAM-1002 and d) L3 in UAM-1000.

**Table S1.** Summary of the properties computed for the hypothetical frameworks formed with L1, L2 and TCPE. The blue text highlights MOFs reported experimentally in this work.

| Ligand | Topology | DFT energy [eV/atom] | Density (g/ cm <sup>3</sup> ) | Accessible pore volume (cm <sup>3</sup> /g) | Accessible surface area (m <sup>2</sup> /g) |
|--------|----------|----------------------|-------------------------------|---------------------------------------------|---------------------------------------------|
| L1     | csq      | -255.275             | 0.853                         | 0.516                                       | 1444                                        |
| L1     | flu      | -255.263             | 1.075                         | 0.260                                       | 1544                                        |
| L1     | scu      | -255.146             | 1.927                         | 0.018                                       | 0                                           |
| L1     | sqc      | -255.270             | 1.304                         | 0.122                                       | 880                                         |
| L2     | csq      | -233.897             | 0.600                         | 0.945                                       | 2220                                        |
| L2     | flu      | -233.883             | 0.936                         | 0.349                                       | 1996                                        |
| L2     | scu      | -233.900             | 1.267                         | 0.172                                       | 1190                                        |
| L2     | sqc      | -233.718             | 1.358                         | 0.092                                       | 546                                         |
| TCPE   | csq      | -194.683             | 0.393                         | 1.691                                       | 3626                                        |
| TCPE   | flu      | -194.681             | 0.513                         | 1.085                                       | 3683                                        |
| TCPE   | scu      | -194.678             | 0.473                         | 1.236                                       | 3648                                        |
| TCPE   | sqc      | -194.679             | 1.298                         | 0.126                                       | 905                                         |

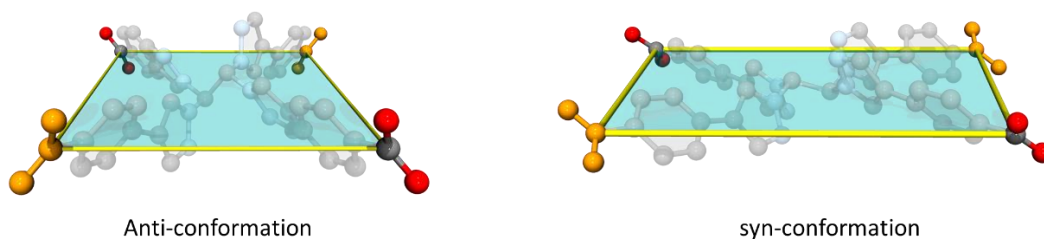

**Figure S24.** Representations of TCPE in UAM-1002 (left) with its anti-conformation of the bispyrazole groups and UAM-1000 (right) in its syn conformation. The carboxylates that change orientation are highlighted in orange.

**Table S2.** Relative UFF energies (kJ/mol per atom) for L1 and TPCE for different ligand conformations.

| ligand | topology | syn-syn | anti-anti |
|--------|----------|---------|-----------|
| 1      | csq      | 0.821   | 1.459     |
| 1      | flu      | 3.489   | 1.875     |
| 1      | scu      | 0.000   | 1.100     |
| 1      | sqc      | 2.544   | 2.759     |
| TCPE   | csq      | 0.000   | 0.571     |
| TCPE   | flu      | -       | 0.688     |
| TCPE   | scu      | 0.219   | 0.634     |
| TCPE   | sqc      | 0.090   | 2.359     |

**Table S3.** Energy-dispersive X-ray (EDX) data for Pd and Cl before and after metalation of **UAM-10**, **UAM11** and **UAM1002**. The % occupancy in the bis(pyrazolyl)methane coordinating sites was determined by measuring Zr:Pd and Pd:Cl ratios.

| Sample                              | Pd (% occupancy) <sup>a,b</sup> | Cl (% occupancy) <sup>a,b</sup> |
|-------------------------------------|---------------------------------|---------------------------------|
| <b>UAM-10</b> · PdCl <sub>2</sub>   | 23.2 ± 10                       | 59.4 ± 14                       |
| <b>UAM-11</b> · PdCl <sub>2</sub>   | 10.0 ± 9                        | 22.3 ± 14                       |
| <b>UAM-1002</b> · PdCl <sub>2</sub> | 98.5 ± 3                        | 200 ± 3                         |

<sup>a</sup> Average atomic% obtained from three areas of three different crystals.

<sup>b</sup> Relative to full occupancy of the bis(pyrazolyl)methane sites in the corresponding MOF (Zr:M = 3:2).

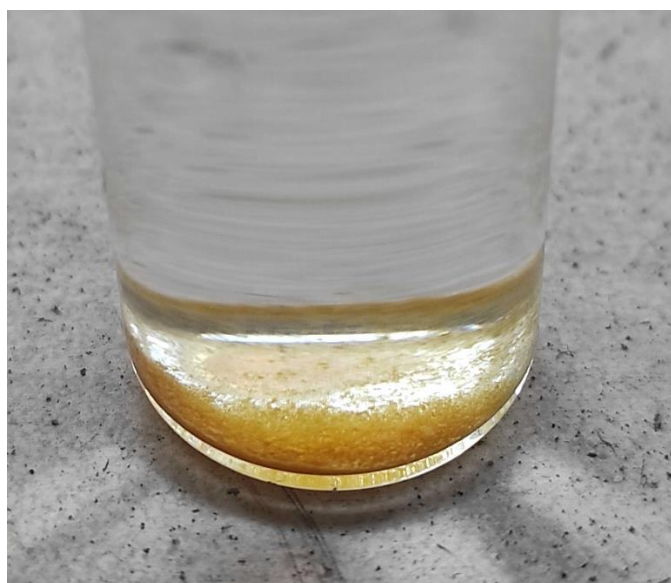

**Figure S25.** Image of bulk **UAM-1002**[PdCl<sub>2</sub>] showing the orange colouration of the crystals.



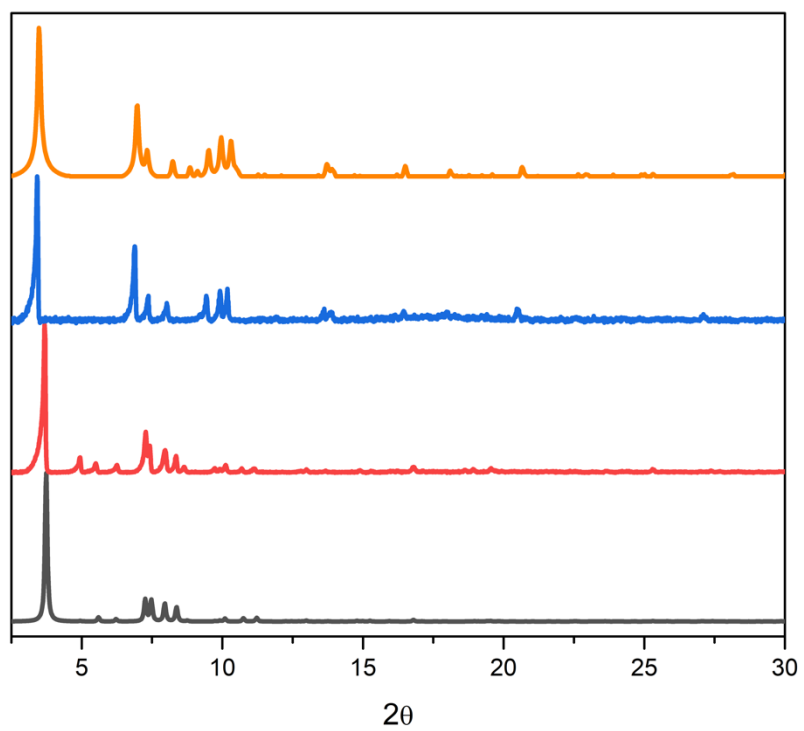

**Figure S26.** PXRD plots for **UAM-1002 as made** (red) versus simulated **UAM-1002** (black) and **UAM-1002[PdCl<sub>2</sub>] as made** (blue) versus simulated **UAM-1002[PdCl<sub>2</sub>]** (orange).

## S2. Fourier Transform Infrared Spectroscopy (FTIR) spectra

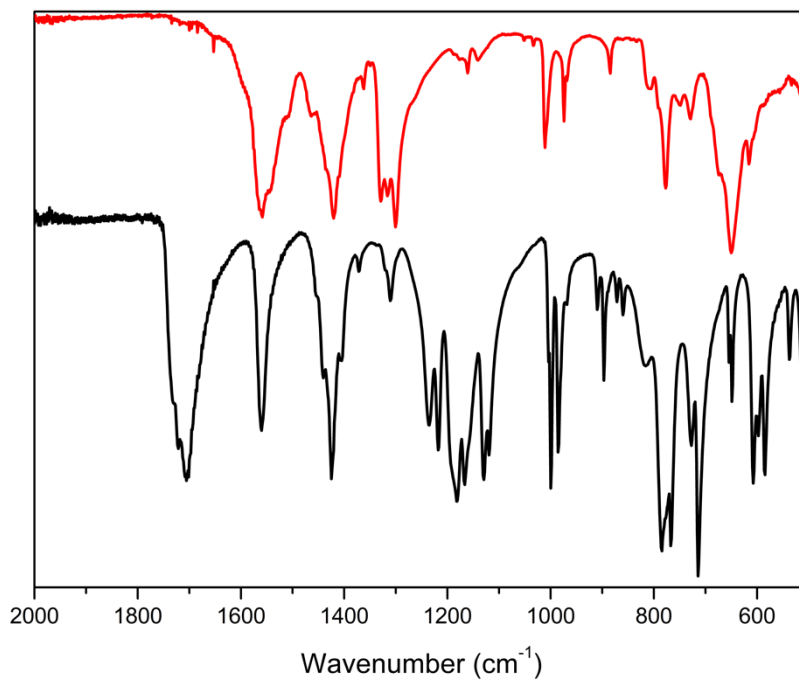

**Figure S27.** FTIR spectra of **L1H<sub>4</sub>** (black) and **UAM-10** as made (red).

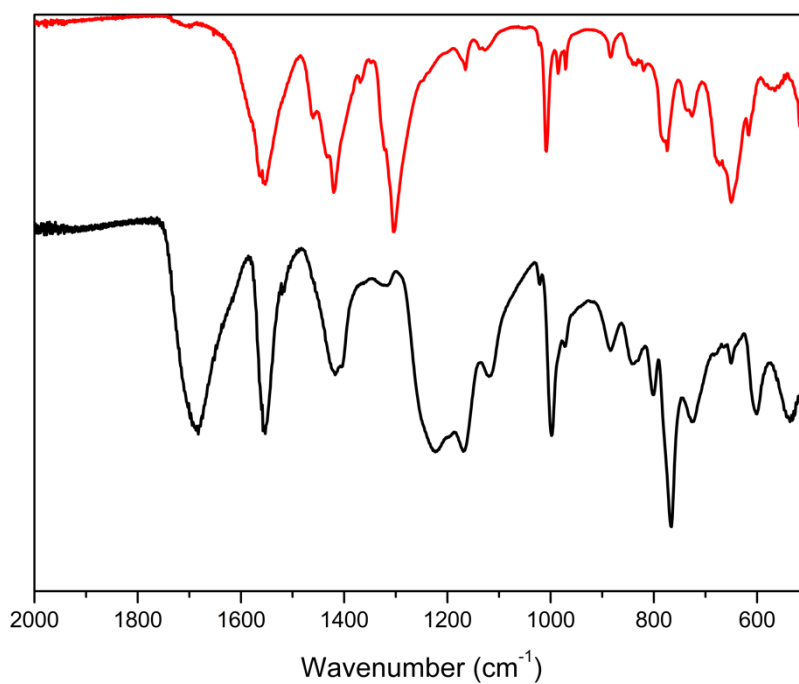

**Figure S28.** FTIR spectra of **L2H<sub>4</sub>** (black) and **UAM-11** as made (red).

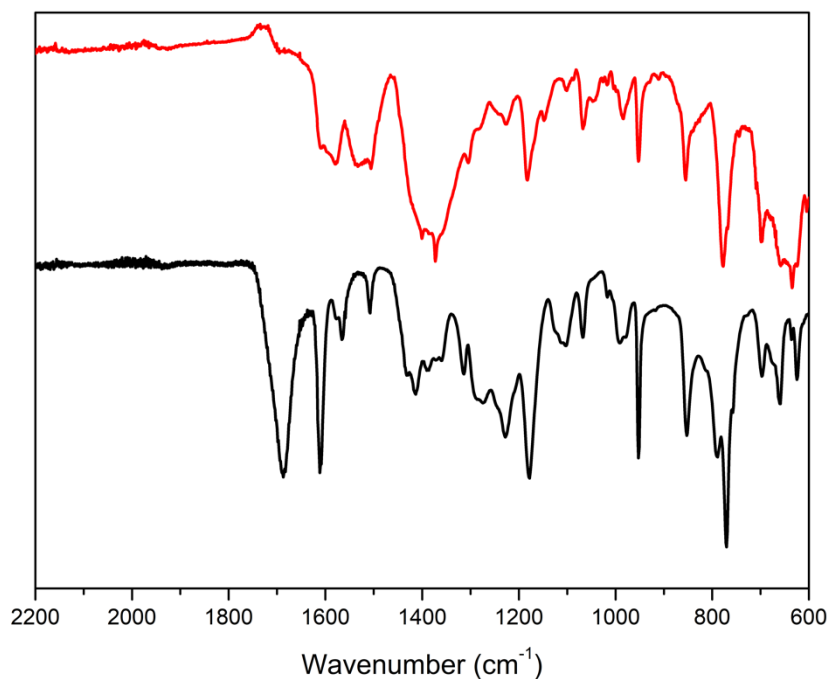

**Figure S29.** FTIR spectra of **TCPE** (black) and **UAM-1002** as made (red).

### S3. Adsorption experiments

**Table S4.** Experimental and simulated BET surface areas based on the crystal structures for UAM-10, UAM-11, UAM-1000 and UAM-1002 ( $\text{m}^2 \text{g}^{-1}$ ).

| Sample   | Experimental | Calculated |
|----------|--------------|------------|
| UAM-10   | 864          | 1300       |
| UAM-11   | 844          | 2400       |
| UAM-1000 | 391          | 3100       |
| UAM-1002 | 567          | 3400       |

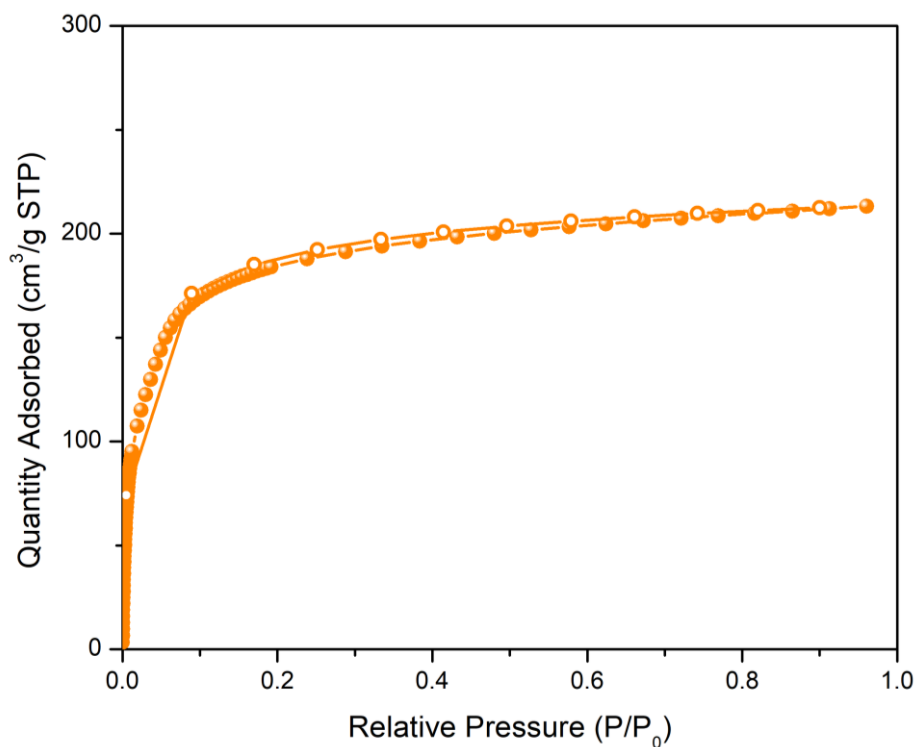

**Figure S30.** 195 K CO<sub>2</sub> isotherm of **UAM-10** after activation from acetone at 120 °C for 3 h. Filled circles represent adsorption; open circles represent desorption.

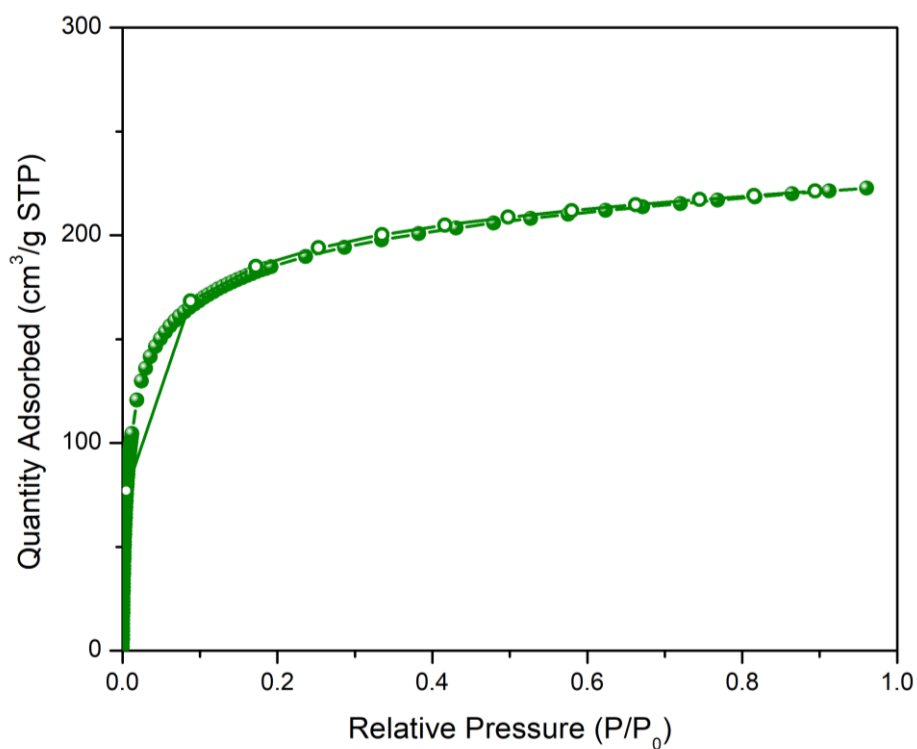

**Figure S31.** 195 K CO<sub>2</sub> isotherm of **UAM-11** after activation from acetone at 120 °C for 3 h. Filled circles represent adsorption; open circles represent desorption.

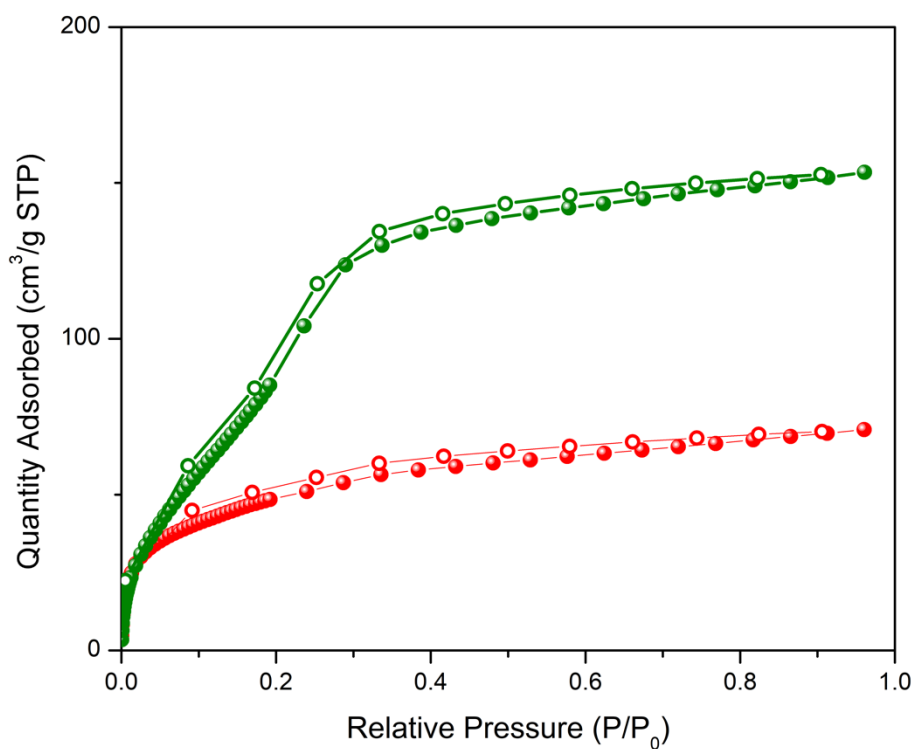

**Figure S32.** 195 K CO<sub>2</sub> isotherm of UAM-1002 after activation from acetone at 120 °C for 3 h (red) and after activation under supercritical CO<sub>2</sub> (green). Filled circles represent adsorption; open circles represent desorption.

## S4. Single crystal X-ray crystallography

### S4.1. Specific Data and Refinement Details

**UAM-10.** The pyrazole rings were modelled by adding them as a fragment. The atoms corresponding to the DMF molecule in the pore were left isotropic as they are too disordered to allow anisotropic refinement.

**UAM-11.** No special refinement details.

**UAM-1002.** The phenyl and pyrazole rings were modelled with AFIX restraints due to the crystallographic disorder.

**UAM-1002[PdCl<sub>2</sub>].** Some of the atoms of the pyrazole rings had to be modelled with EADP restraints due to the proximity of the atoms arising from crystallographic disorder of the pyrazole rings.

### S4.2. Thermal ellipsoid plots for all structures at the 50% probability level

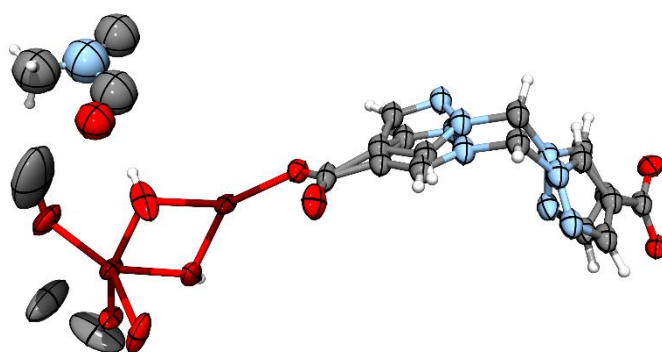

**Figure S33.** Asymmetric unit of **UAM-10**, with all non-hydrogen atoms represented by ellipsoids at the 50% probability level (C, grey; H, white; N, light blue; O, red; Zr, dark red).

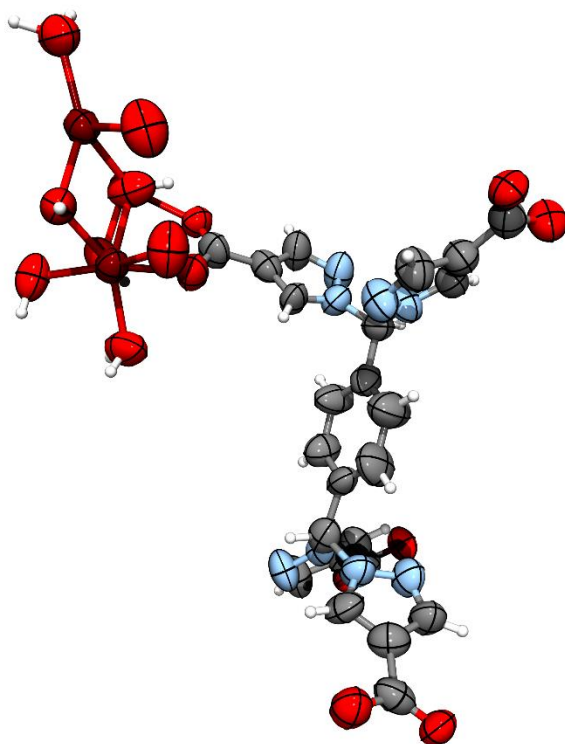

**Figure S34.** Asymmetric unit of **UAM-11**, with all non-hydrogen atoms represented by ellipsoids at the 50% probability level (C, grey; H, white; N, light blue; O, red; Zr, dark red).

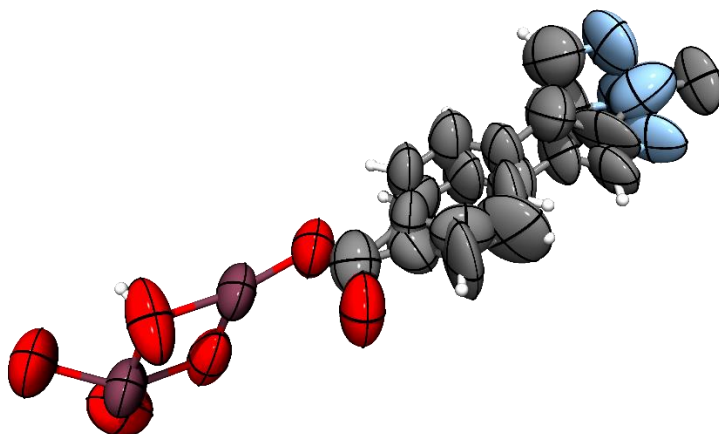

**Figure S35.** Asymmetric unit of **UAM-1002**, with all non-hydrogen atoms represented by ellipsoids at the 50% probability level (C, grey; H, white; N, light blue; O, red; Zr, dark red).

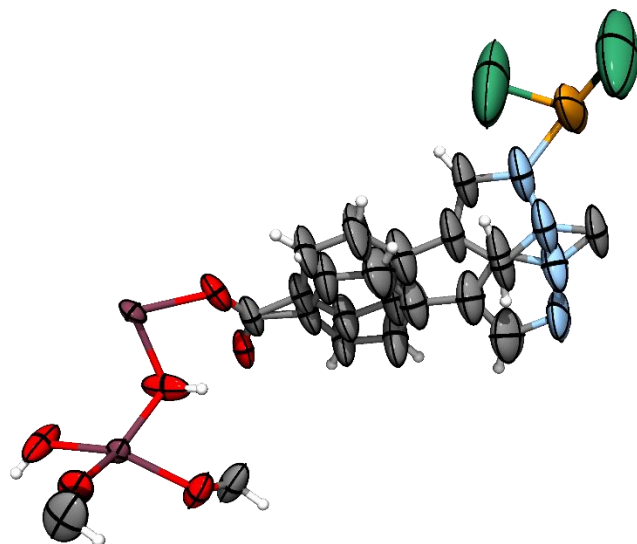

**Figure S36.** Asymmetric unit of **UAM-1002[PdCl<sub>2</sub>]**, with all non-hydrogen atoms represented by ellipsoids at the 50% probability level (C, grey; H, white; N, light blue; O, red; Zr, dark red; Pd, orange; Cl, chlorine).



### S4.3. Tables of X-ray crystallography data collection and refinement parameters

**Table S5.** Crystallographic data collection and refinement parameters for **UAM-10**, **UAM-11**, **UAM-1002** and **UAM-1002[PdCl<sub>2</sub>]**.

| Sample                                        | UAM-10                                                                             | UAM-11                                                                          | UAM-1002                                                                          | UAM-1002-PdCl <sub>2</sub>                                                                            |
|-----------------------------------------------|------------------------------------------------------------------------------------|---------------------------------------------------------------------------------|-----------------------------------------------------------------------------------|-------------------------------------------------------------------------------------------------------|
| <b>Crystallographic Parameter</b>             |                                                                                    |                                                                                 |                                                                                   |                                                                                                       |
| Formula                                       | C <sub>12</sub> H <sub>8</sub> N <sub>4.5</sub> O <sub>8.5</sub> Zr <sub>1.5</sub> | C <sub>12</sub> H <sub>11</sub> N <sub>4</sub> O <sub>8</sub> Zr <sub>1.5</sub> | C <sub>10.5</sub> H <sub>7</sub> N <sub>2</sub> O <sub>4</sub> Zr <sub>0.75</sub> | C <sub>11</sub> H <sub>7.5</sub> ClN <sub>2</sub> O <sub>4</sub> Pd <sub>0.5</sub> Zr <sub>0.75</sub> |
| FW                                            | 488.06                                                                             | 476.08                                                                          | 293.6                                                                             | 388.75                                                                                                |
| T, K                                          | 100(2)                                                                             | 100(2)                                                                          | 100(2)                                                                            | 100(2)                                                                                                |
| Wavelength, Å                                 | monoclinic                                                                         | orthorhombic                                                                    | orthorhombic                                                                      | orthorhombic                                                                                          |
| Crystal system, space group                   | <i>C2/m</i>                                                                        | <i>Cmce</i>                                                                     | <i>Cmmm</i>                                                                       | <i>Cmmm</i>                                                                                           |
| Z                                             | 22.511(5)                                                                          | 29.301(7)                                                                       | 33.273(7)                                                                         | 33.4742(5)                                                                                            |
| a, Å                                          | 23.641(5)                                                                          | 22.313(8)                                                                       | 35.780(7)                                                                         | 38.7659(6)                                                                                            |
| b, Å                                          | 10.046(2)                                                                          | 21.132(4)                                                                       | 12.220(2)                                                                         | 9.98330(10)                                                                                           |
| c, Å                                          | 90                                                                                 | 90                                                                              | 90                                                                                | 90                                                                                                    |
| α°                                            | 90.01(3)                                                                           | 90                                                                              | 90                                                                                | 90                                                                                                    |
| β, °                                          | 90                                                                                 | 90                                                                              | 90                                                                                | 90                                                                                                    |
| γ°                                            | 5346.3(18)                                                                         | 13816(7)                                                                        | 14548(5)                                                                          | 12954.9(3)                                                                                            |
| V, Å <sup>3</sup>                             | 8                                                                                  | 16                                                                              | 16                                                                                | 16                                                                                                    |
| d <sub>calc</sub> , g/cm <sup>3</sup>         | 1.213                                                                              | 0.916                                                                           | 0.536                                                                             | 0.797                                                                                                 |
| Absorption coefficient, mm <sup>-1</sup>      | 0.63                                                                               | 0.485                                                                           | 0.236                                                                             | 5.14                                                                                                  |
| F(000)                                        | 1916                                                                               | 3760                                                                            | 2336                                                                              | 3032                                                                                                  |
| Crystal size, mm <sup>3</sup>                 | 0.104 × 0.063 × 0.02                                                               | 0.04 × 0.035 × 0.028                                                            | 0.197 × 0.031 × 0.027                                                             | 0.174 × 0.042 × 0.03                                                                                  |
| Radiation                                     | Synchrotron (λ = 0.71073)                                                          | Synchrotron (λ = 0.71073)                                                       | Synchrotron (λ = 0.71073)                                                         | Cu Kα (λ = 1.54184)                                                                                   |
| 2θ range for data collection                  | 2.498 to 57.294                                                                    | 2.78 to 57.368                                                                  | 1.672 to 57.364                                                                   | 5.28 to 152.882                                                                                       |
| Index range                                   | -30 ≤ h ≤ 29, -29 ≤ k ≤ 29, -13 ≤ l ≤ 13                                           | -38 ≤ h ≤ 39, -29 ≤ k ≤ 29, -25 ≤ l ≤ 25                                        | -43 ≤ h ≤ 43, -47 ≤ k ≤ 46, -16 ≤ l ≤ 16                                          | -40 ≤ h ≤ 38, -48 ≤ k ≤ 39, -12 ≤ l ≤ 9                                                               |
| Reflections collected                         | 33666                                                                              | 84271                                                                           | 86300                                                                             | 34370                                                                                                 |
| Independent reflections                       | 5477 [R <sub>int</sub> = 0.0732, R <sub>sigma</sub> = 0.0435]                      | 7571 [R <sub>int</sub> = 0.2390, R <sub>sigma</sub> = 0.1079]                   | 8298 [R <sub>int</sub> = 0.1189, R <sub>sigma</sub> = 0.0614]                     | 6887 [R <sub>int</sub> = 0.0392, R <sub>sigma</sub> = 0.0307]                                         |
| Data/restraints/parameters                    | 5477/87/220                                                                        | 7571/0/235                                                                      | 8298/0/236                                                                        | 6887/0/222                                                                                            |
| GOF on F <sup>2</sup>                         | 1.06                                                                               | 0.878                                                                           | 0.936                                                                             | 1.134                                                                                                 |
| Largest diff. peak and hole, eÅ <sup>-3</sup> | 1.33/-0.74                                                                         | 0.52/-0.89                                                                      | 0.44/-1.00                                                                        | 0.86/-1.28                                                                                            |
| R <sub>1</sub> , [I > 2σ(I)]                  | 0.0560                                                                             | 0.0716                                                                          | 0.1144                                                                            | 0.0488                                                                                                |
| wR <sub>2</sub> , all data                    | 0.1705                                                                             | 0.2304                                                                          | 0.3759                                                                            | 0.1507                                                                                                |
| CCDC Number                                   | 2288076                                                                            | 2288077                                                                         | 2288079                                                                           | 2288078                                                                                               |

## S5. Le Bail Refinements of the PXRD Data

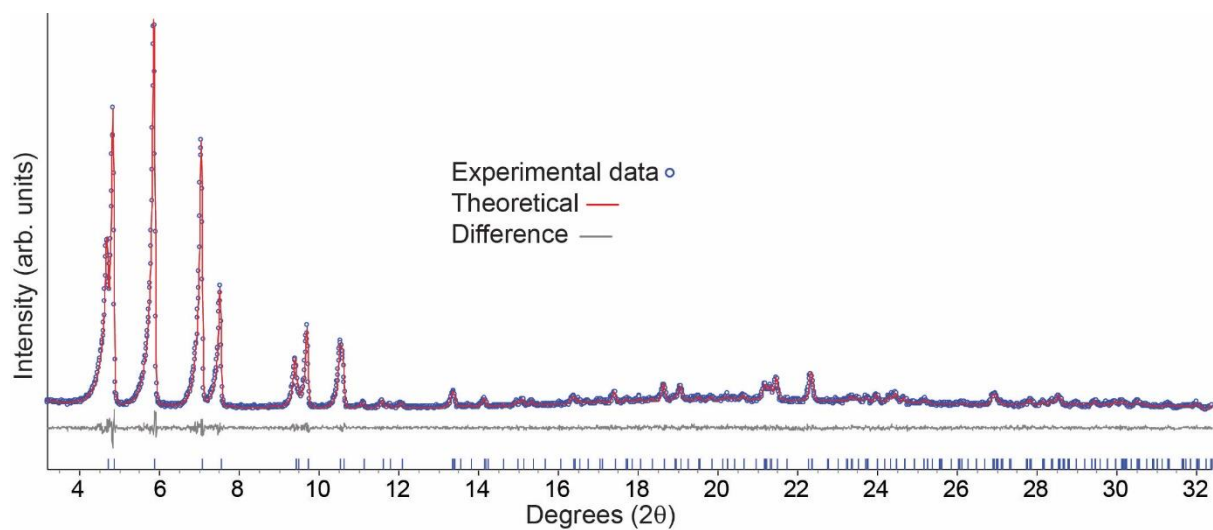

**Figure S37.** Le Bail refinement of the Powder X-ray diffraction pattern of **UAM-1000**. Refinement parameters:  $R_p = 5.64$ ,  $R_{wp} = 7.70$ ,  $GoF = 1.15$ . Cell parameters  $I4_1/amd$ ,  $a = 18.7$ ;  $c = 75.0$  Å. For comparison, the cell parameters of the single crystal X-ray structure:  $I4_1/amd = 17.9$ ;  $c = 78.8$  Å.

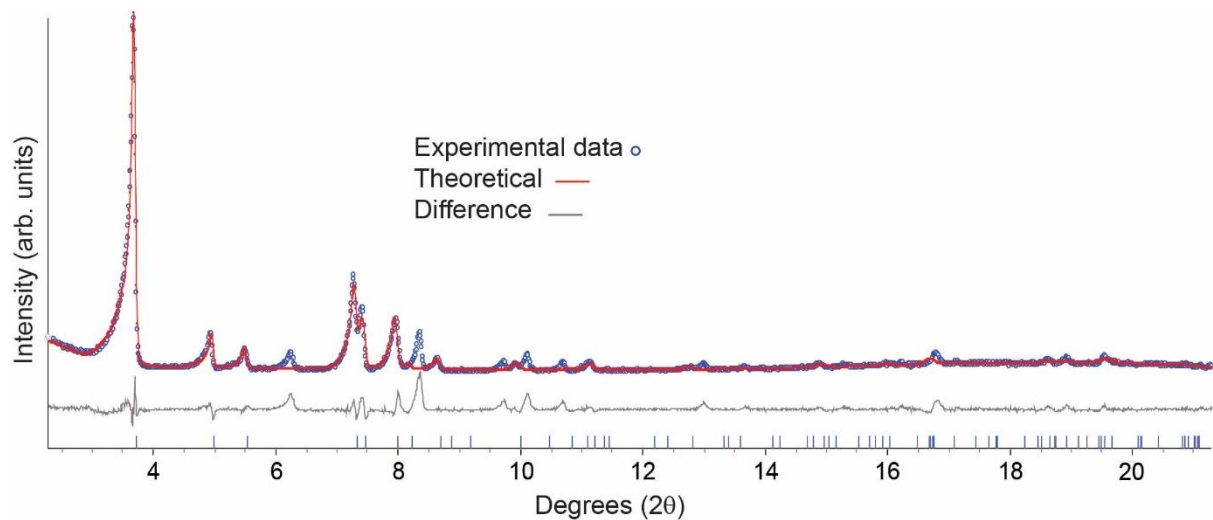

**Figure S38.** Le Bail refinement of the Powder X-ray diffraction pattern of **UAM-1002**. Refinement parameters:  $R_p = 10.07$ ,  $R_{wp} = 16.62$ ,  $GoF = 3.40$ . Cell parameters  $Cmmm$ ,  $a = 31.8$ ;  $b = 35.3$ ;  $c = 12.1$  Å. For comparison, the cell parameters of the single crystal X-ray structure:  $Cmmm = a = 33.3$ ;  $b = 35.8$ ;  $c = 12.2$  Å.

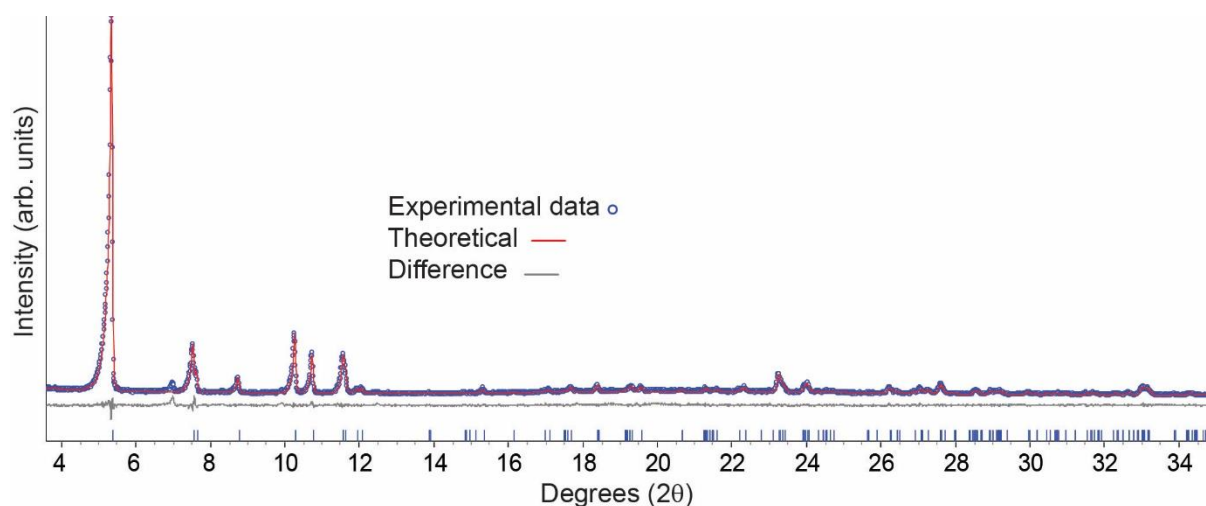

**Figure 39.** Le Bail refinement of the Powder X-ray diffraction pattern of **UAM-10**. Refinement parameters:  $R_p = 6.53$ ,  $R_{wp} = 9.50$ ,  $GoF = 1.34$ . Cell parameters  $C2/m$ ,  $a = 23.4$ ;  $b = 23.1$ ;  $c = 10.0 \text{ \AA}$ ;  $\beta = 90.1^\circ$ . For comparison, the cell parameters of the single crystal X-ray structure:  $C2/m$ ,  $a = 22.5$ ;  $b = 23.6$ ;  $c = 10.0 \text{ \AA}$ ;  $\beta = 90.0^\circ$ .

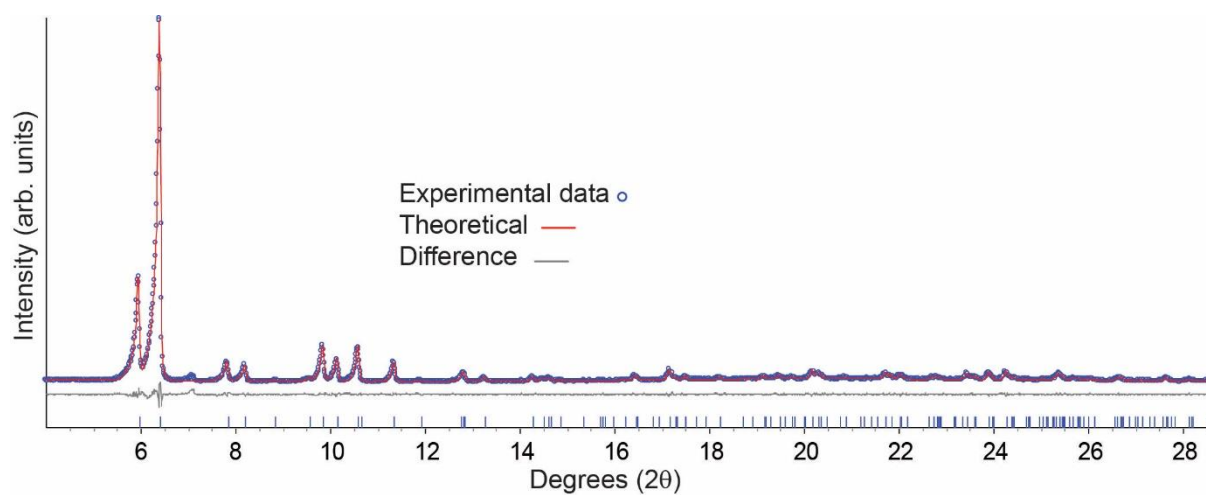

**Figure S40.** Le Bail refinement of the Powder X-ray diffraction pattern of **UAM-11**. Refinement parameters:  $R_p = 6.53$ ,  $R_{wp} = 9.50$ ,  $GoF = 1.34$ . Cell parameters  $Cmca$ ,  $a = 29.7$ ;  $b = 22.6$ ;  $c = 21.6 \text{ \AA}$ . For comparison, the cell parameters of the single crystal X-ray structure:  $Cmca$ ,  $a = 29.3$ ;  $b = 22.3$ ;  $c = 21.1 \text{ \AA}$ .
